# Supplementary material for: A nano curcumin–multi-walled carbon nanotube composite as a fluorescence chemosensor for trace determination of celecoxib in serum samples
Source: Royal Society of Chemistry journal article supplement (doi:10.1039/d2ay01386j), 2022-01-01
Supplement: d2ay01386j1.pdf [file d2ay01386j1.pdf]

# **Nano Curcumin-Multi-Walled Carbon Nanotube Composite as a Fluorescence Chemosensor for Trace Determination of Celecoxib in Serum Samples**

Nahid Pourreza\*, Behrooz Zargar, Reza Hoveizavi

*Department of Chemistry, Faculty of Science, Shahid Chamran University of Ahvaz, Ahvaz, Iran.*

## *2.3. Synthesis of curcumin nanoparticles*

The method described by Bhawana et al.<sup>21</sup> was used for the fabrication of CUNPs after slight modification of the procedure.<sup>22</sup> More details are presented in Supporting Information. Two solutions were prepared; (1) 125 mg of curcumin was dissolved in 25 mL of dichloromethane as the organic phase; (2) The aqueous phase was prepared by diluting 10 mL of Triton X-100 5% (v/v) to 90 mL of boiling water. Then 2 mL of the solution (1) was added dropwise (about 10 drops/min) to the solution (2) under ultrasonic action. The sonication was continued for another 20 min. The solution was stirred at 1500 rpm by a magnetic stirrer at room temperature for 20 min until a yellow colored solution was obtained. The prepared solution was placed in a rotary evaporator to remove dichloromethane completely. This solution was stored in a brown bottle.

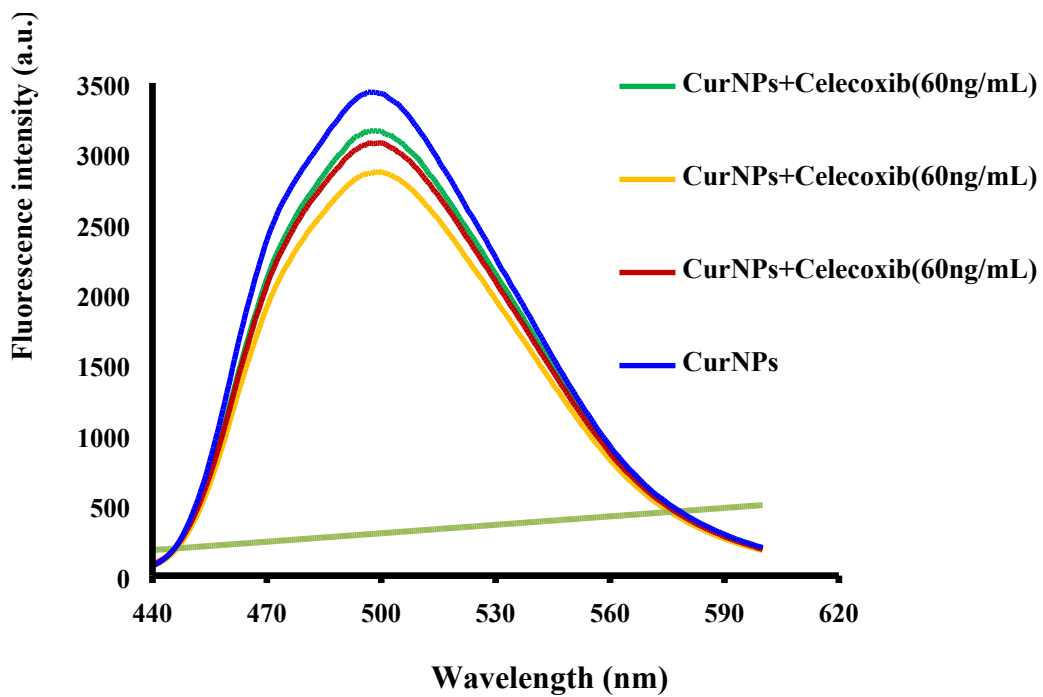

**Fig. S1** The fluorescence spectra of CurNPs before and after adding three additions of same celecoxib concentration ( $60 \text{ ng mL}^{-1}$ ). RSD >10%
